# Supplementary material
Source: publisher figshare collection journal article supplement (https://future-science-group.figshare.com/ndownloader/files/27699495)
Supplement: Supplementary file 1 [file 27699495]

| DMR1 | Chr2 | Start3 | End3 | Gene Name3 | CpG sites in DMR | CpG site  Delta Beta value | FDR for DMR4 |
| --- | --- | --- | --- | --- | --- | --- | --- |
| 1 | 2 | 177053274 | 177053496 | *HOXD1* | cg05099387 | -0.004 | 1.12E-08 |
|  |  |  |  |  | cg02150988 | -0.007 |  |
|  |  |  |  |  | cg19180624 | -0.006 |  |
|  |  |  |  |  | cg23420260 | -0.013 |  |
|  |  |  |  |  | cg19542816 | -0.005 |  |
|  |  |  |  |  | cg19001226 | -0.001 |  |
|  |  |  |  |  | cg03450948 | -0.009 |  |
| 2 | 22 | 38092643 | 38093207 | *TRIOBP* | cg10921709 | -0.016 | 2.45E-16 |
|  |  |  |  |  | cg11679014 | -0.011 |  |
|  |  |  |  |  | cg11540735 | -0.014 |  |
|  |  |  |  |  | cg14268632 | -0.013 |  |
|  |  |  |  |  | cg12325455 | -0.016 |  |
|  |  |  |  |  | cg06644488 | -0.015 |  |
|  |  |  |  |  | cg06594770 | -0.013 |  |
|  |  |  |  |  | cg05691152 | -0.015 |  |
|  |  |  |  |  | cg12379720 | -0.021 |  |
|  |  |  |  |  | cg13897416 | -0.013 |  |
| 3 | 7 | 158937969 | 158938060 | *VIPR2* | cg23572908 | -0.007 | 9.04E-10 |
|  |  |  |  |  | cg25189564 | -0.006 |  |
|  |  |  |  |  | cg20673829 | -0.002 |  |

Supplementary table 1. List of differentially methylated regions among migrants compared to non-migrants

1 DMR= differentially methylated region

2 Chr = Chromosome

3 Annotation were perfomed via IlluminaHumanMethylation450kanno.ilmn12.hg19. Homo sapiens (human) genome assembly GRCh37 (hg19). *HansenKD(2016). IlluminaHumanMethylation450kanno.ilmn12.hg19: Annotation for Illumina's 450k methylation arrays. R package version 0.6.0*

4 FDR = false discovery rate (FDR < 0.05 was considered significant).
